# Supplementary material for: Deciphering spatial genomic heterogeneity at a single cell resolution in multiple myeloma
Source: Research Square preprint supplement (doi:10.21203/rs.3.rs-146899/v1), 2021-01-16
Supplement: Supplementary file 4 [file 0b44c9c1f34b0b9f36053f0f.xlsx]

## Sheet: Sheet1
						Histology	FACS		scRNA-seq		IgG	IgA	IgM	kappa	lambda	FLC	Hb	Crea	Calcium	Albumin	beta2	LDH	FISH
Patient	Sex	Disease status	Subtype	Location	EMD	% plasma cells	% plasma cells after sorting	viability	cells sequenced	cells passed QC	700-1600 mg/dl	70-390 mg/dl	50-230 mg/dl	3-19 mg/l	6-26 mg/l		12.5-15.5 g/dl	0.52-1.04 mg/dl	8.4-10.2 mg/dl	3.5-5.0 g/dl	0.8-2.34 mg/l	313-618 IU/l
NDMM01	male	new	IgG kappa	bone marrow	n	10	96	92	4365	2227	1006	180	62	45	13	3.46154	15.3	1.09	9.9	4.6	2.29	361	normal
				L2		20	96	90	8086	7788
NDMM02	male	new	IgG lambda	bone marrow	n	70	97	98	9709	8753	4053	0	0	11	2482	225.636	11.9	1.44	8.7	3.9			HD, del13, del15, IgH unknown
				iliac crest (L)		60	99	94	11578	10303
NDMM03	female	new	IgG kappa	bone marrow	n	1	77	91	6032	5148	1407	218	89	536	25	21.44	14.3	0.78	9.6	4.8	3.54	427	normal
				L3		10	79	89	10029	9184
NDMM04	female	new	lambda	bone marrow	n	10	91	97	10266	8810	478	0	0	11	1293	117.545	12.9	0.85	9.7	4.1	4.25	647	IgH unknown
				sacrum		50	78	96	10012	8563
NDMM05	female	new	IgG kappa	bone marrow	n	25	95	89	13367	12825	3825	70	59	559	7	79.8571	10.4	0.70	9.7	4.4	2.27	472	HD (both)
				iliac crest (R)		25	72	92	4651	4050
NDMM06	female	new	IgA kappa	bone marrow	n	60	100	100	9853	6700	0	3171	25	59	1	59	9.8	0.60	9.9	4.3	4.09	353	del13, del16, del17, gain15, t(11;14)
				T11		80	100	97	9988	8207
				L4		80	100	97	9268	7549
NDMM07	male	new	IgG kappa	bone marrow	n	95	100	99	14135	6849	9338	52	0	3343	6	557.167	7.2	2.67	10.7	2.8	18.95	714	del1p, HD
				iliac crest (L)		95	100	99	9921	6092
RRMM01	male	relapse	IgA kappa/lambda	bone marrow	y	5	91	81	8297	7865	702	222	36	15	64	biclonal	11.0	0.84	8.6	3.7			gain1, t(MYC)
				clavicle (R)		100	na	92	1742	1383
RRMM02	male	relapse	IgG lambda	bone marrow	n	60	87	90	11870	6925	297	0	0	2	1	1	12.5	0.94	9.5	4.3			HD
				iliac crest (R)		60	94	85	3329	2110
RRMM03	male	relapse	IgG kappa	bone marrow	n	15	97	87	14746	7712	730	0	0	72	6	12	11.5	0.76	8.6	3.9	2.18	508	del16, del17
				iliac crest (R)		15	99	90	18401	9594
